# Supplementary material for: AHR Signaling Dampens Inflammatory Signature in Neonatal Skin γδ T Cells
Source: PubMed Central journal article supplement (PMC7139545; doi:10.3390/ijms21062249), 2020-03-24
Supplement: ijms-21-02249-s001.pdf [file ijms-21-02249-s001.pdf]

# AHR signaling dampens inflammatory signature in neonatal skin $\gamma\delta$ T cells.

Katja Merches <sup>1</sup>, Alfonso Schiavi <sup>1,4</sup>, Heike Weighardt <sup>2</sup>, Swantje Steinwachs <sup>1</sup>, Nadine Teichweyde <sup>1</sup>, Irmgard Förster <sup>2</sup>, Katrin Hochrath <sup>1</sup>, Beatrix Schumak <sup>3</sup>, Natascia Ventura <sup>1,4</sup>, Patrick Petzsch <sup>5</sup>, Karl Köhrer <sup>5</sup> and Charlotte Esser <sup>1,\*</sup>

<sup>1</sup> IUF – Leibniz Research Institute for Environmental Medicine, Auf'm Hennekamp 50, D-40225 Düsseldorf, GERMANY

<sup>2</sup> Immunology and Environment, Life & Medical Sciences (LIMES) Institute, University of Bonn, Carl-Troll-Str. 31, D-53115 Bonn, GERMANY;

<sup>3</sup> Institute of Medical Microbiology, Immunology and Parasitology, University of Bonn, Venusberg Campus 1, D-53127 Bonn, GERMANY

<sup>4</sup> Institute of Clinical Chemistry and Laboratory Diagnostic, University of Düsseldorf, Universitätsstrasse 1, D-40225 Düsseldorf, GERMANY

<sup>5</sup> BMFZ – Genomics & Transcriptomics Laboratory, University of Düsseldorf, Universitätsstrasse 1, D-40225 Düsseldorf, GERMANY

\* Correspondence: Charlotte.Esser@iuf-duesseldorf.de; Tel.: +49-211-3389-253

## Supplementary Data

### Supplementary Materials

#### Supplemental Table 1

Primer sequences for quantitative real-time PCR

|                               |                         |              |                        |
|-------------------------------|-------------------------|--------------|------------------------|
| <i>Rps6</i>                   | (TACTGTGCCTCGTCGGTTG,   | antisense:   | TGAATCTTGGGTGCTTTGGT), |
| <i>Ifn<math>\gamma</math></i> | (GGCCATCAGCAACAACATAA   | , antisense: | ATCAGCAGCGACTCCTTTTC), |
| <i>Pdl1</i>                   | (AAGTCAATGCCCCATAACCGC, | antisense:   | CTCTTCCCCTCACGGGTTG),  |
| <i>Ccr5</i>                   | (AGACATCCGTTCCCCCTACA,  | antisense:   | GCAGGGTGCTGACATACCAT), |
| <i>Ccl1</i>                   | (GCATGCTTACGGTCTCCAAT,  | antisense:   | AGGCGCAGCTTTCTCTACCT), |
| <i>Ccr2</i>                   | (CAGAAGAGGGCATTGGATTC,  | antisense:   | CAAGGCTCACCATCATCGTA), |
| <i>Ccr1</i>                   | (GTTGGGACCTTGAACCTTGA,  | antisense:   | TCCTTTGCTGAGGAACTGGT), |
| <i>Kenmal</i>                 | (ATATCCGCCAGACTGAC,     | antisense:   | ATCGTTGGCTGCAATAAACC), |
| <i>Camk2d</i>                 | (TCCATCGGGACCTAAAGCCT,  | antisense:   | TGCCAGCAAACCAAACCAT),  |
| <i>Fermt2</i>                 | (CCCAGAGATCCCACAAAGAA,  | antisense:   | TATCCCAGGATTGCCTTCTG), |

*Arhgap6* (TTTGACCGTGGGGTTGATGT, antisense: GGCTCCAACAGGAGAGTGTT),  
*Rhod* (AACCTGTGCACCTCCAAATC, antisense: CACAACAATGATGGGCACTC),  
*Advillin* (GTGGAGGTGGATCAGCAGTT, antisense: GTTGGAGTTGAGCGAGGAAG),  
*Il10ra* (GCCCTCAAACAGTACGGAAA, antisense: AAGCGAGTCTCAGTGGTGGT),  
*Scinderin* (CAGGGTGCCTATGGTGACTT, antisense: CTTGCCACCCAAATAGTCGT),  
*GranzymeF* (TGACCCTTCTTCTGCCTCTC, antisense: TCATTGAGCTTCCAGTGCAG),  
*C-Kit* (ATCCCGACTTTGTCAGATGG, antisense: AAGGCCAACCAGGAAAAGTT),  
*Rpl39* (CAAAATCGCCCTATTCCTCA, antisense: TTCAAGACACGAAGAGTCTCCA),  
*Isg20* (CCATGACCTGAAGCACGACT, antisense: CCCGCCAGTTGTTCTGGAT),  
*Xrn2* (ACAGCAACTGTATTACCCCAGG, antisense: GGCTGGGCTCTTTGTCTTCT),  
*Kif2c* (GCCGACACATCTAGTGCTGA, antisense: GAGTTCTCCCCAATGAACGA),  
*Smc5* (AATCCTTCGGTGGTTGAGGAG, antisense: CCACCTTTCTTTCACCTGCG),  
*Nek2* (CCTGGACAGCAAACACAATG, antisense: CAAGGACCAGATGTCCGACT),  
*Cyp11a1* (ATATCCCCAAGGGGTGCTGT, antisense: TTCAGGCCGGAACCTCGTTTG)

# Supplementary Figure 1

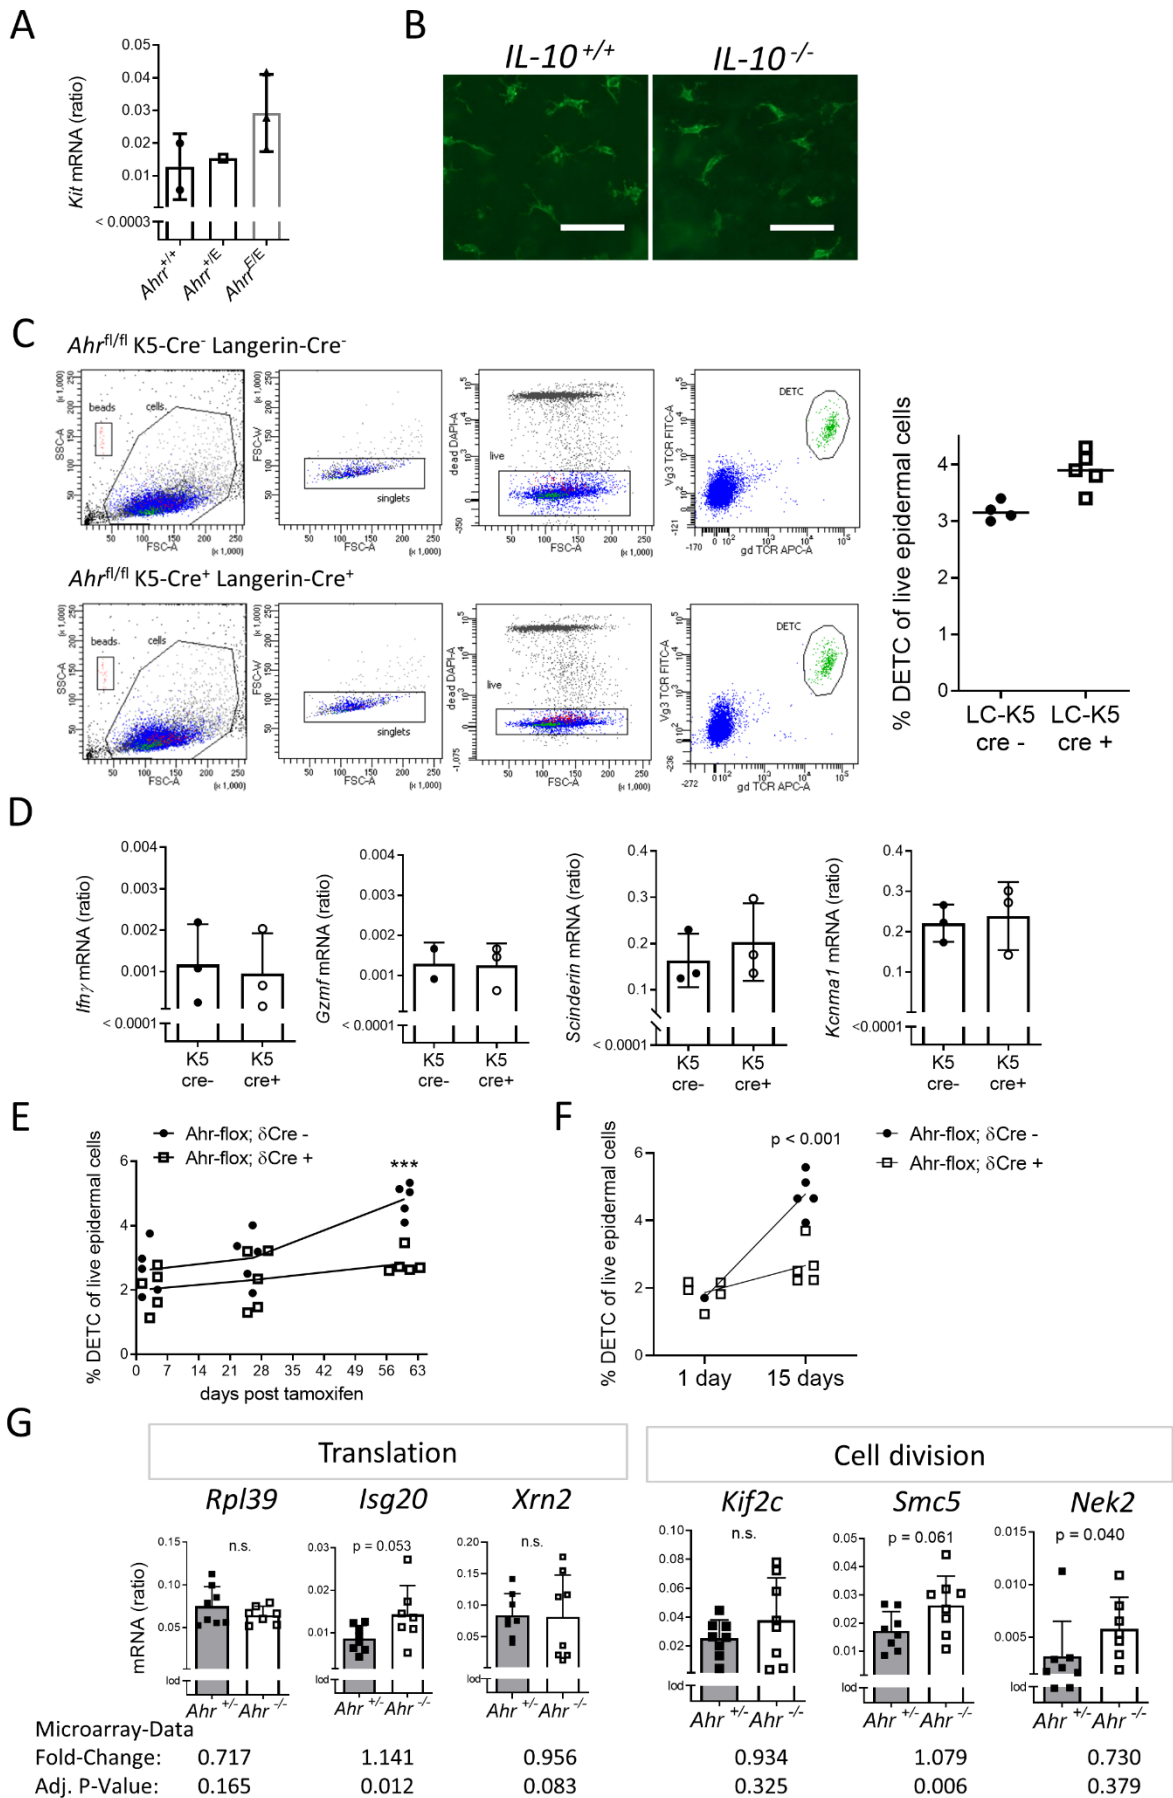

## Supplementary Figure 1

(A) RNA from sorted DETC from 6 – 32 weeks old *Ahrr*<sup>+/+</sup>, *Ahrr*<sup>+E</sup> or *Ahrr*<sup>E/E</sup> mice was isolated and expression of *Kit* was measured by qPCR. Shown are ratios referred to the housekeeper gene *Rps6* (n = 1-3 mice) (B) Representative pictures of epidermal ear sheets from 9-20 weeks old *Il-10*<sup>+/+</sup> or *Il-10*<sup>-/-</sup> mice stained with anti-V $\gamma$ 3 (scale bar = 50  $\mu$ m; n = 3 mice) (C) Epidermal cells from female, 9 weeks old, *Ahr*<sup>fl/fl</sup> Cre- or *Ahr*<sup>fl/fl</sup> K5-Cre+Langerin-Cre+ mice (LC-K5-Cre+) were stained for DETC (V $\gamma$ 3+,  $\gamma\delta$ TCR+) and were analyzed by flow cytometry for the frequency of DETC (n = 4-5 mice). (D) Epidermal cells from male and female, 13-16 weeks old, *Ahr*<sup>fl/fl</sup> Cre- or *Ahr*<sup>fl/fl</sup> K5-Cre+ mice were stained for DETC (V $\gamma$ 3+,  $\gamma\delta$ TCR+) and DETC were FACS-sorted to over 98 % purity and their RNA was isolated. Expression of interferon- $\gamma$  (*Ifn $\gamma$* ), granzyme F (*Gzmf*), scinderin (*Scin*) and *Kcnma1* was measured by qPCR; shown are ratios referred to the housekeeper gene *Rps6* (n = 3 mice) (E) 8 week old Ahr-flox;  $\delta$ Cre+ and  $\delta$ Cre- mice were treated with tamoxifen as described in the methods section. Epidermal cells were isolated 3, 26 and 60 days after the last tamoxifen-injection and stained for DETC by anti- $\gamma\delta$ TCR and anti-V $\gamma$ 3 antibodies. The percentage of DETC from live cells is displayed (2-way-ANOVA with Sidak's test for multiple comparisons, \*\*\* p < 0.001; n = 5 mice) (F) Newborn mice (1 day old) were treated with tamoxifen as described in the method section. Epidermal cells were isolated 1 day and 15 days after the last tamoxifen-treatment and stained for DETC by anti- $\gamma\delta$ TCR and anti-V $\gamma$ 3 antibodies. The percentage of DETC from live cells is displayed (t-test for 15 days timepoint; n = 1-5 mice) (G) RNA of DETC, FACS-sorted from mice two weeks of age, was isolated. Expression of indicated genes was measured by qPCR; shown are ratios to the housekeeper gene *Rps6* (n = 8; Mann-Whitney-test for *Nek2*, t-tests for remaining genes)

## Supplementary Figure 2

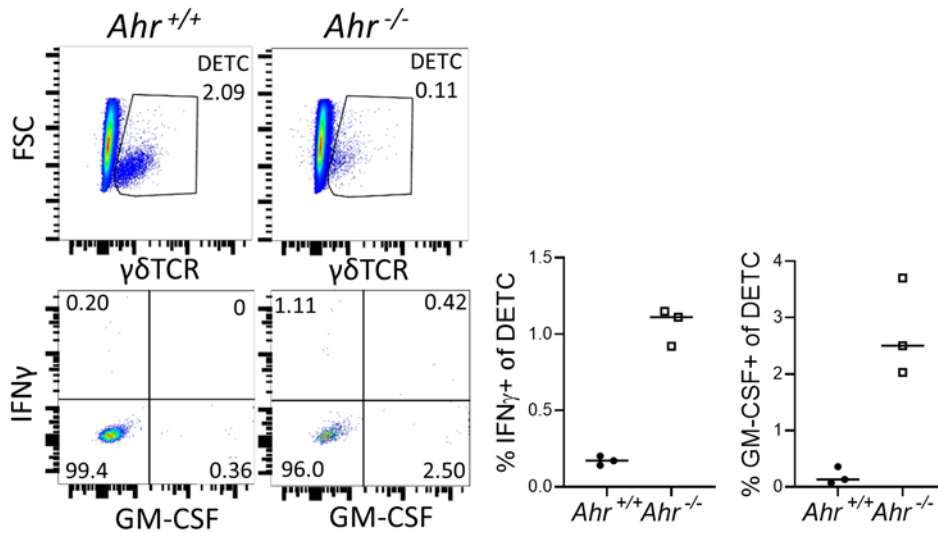

### Supplementary Figure 2

Epidermal cells were isolated from 8 weeks old *Ahr*<sup>+/+</sup> and *Ahr*<sup>-/-</sup> mice and stained for DETC by anti- $\gamma\delta$ TCR-BV711 followed by fixation and intracellular staining for IFN $\gamma$  by anti-IFN $\gamma$ -APC and for GM-CSF by anti-GM-CSF-PE. One representative plot for DETC-gating from live cells and IFN $\gamma$ /GM-CSF proportion among DETC is shown per genotype. The plots were not standardized to a certain cell number. The percentage of IFN $\gamma$ <sup>+</sup> or GM-CSF<sup>+</sup> DETC of all DETC is displayed as graph (n = 3 mice)
